# Supplementary material for: Solid-state synthesis of SnO2–graphene nanocomposite for photocatalysis and formaldehyde gas sensing
Source: Royal Society of Chemistry journal article supplement (doi:10.1039/c4ra06995a), 2014-01-01
Supplement: c4ra06995a1.pdf [file c4ra06995a1.pdf]

## Supporting Information

### **Solid-state synthesis of SnO<sub>2</sub>/grapheme nanocomposite for photocatalysis and formaldehyde gas sensing**

Yali Cao,<sup>‡</sup> Yizhao Li,<sup>‡</sup> Dianzeng Jia\* and Jing Xie

Key laboratory of Material and Technology for Clean Energy, Ministry of Education, Key Laboratory of Advanced Functional Materials, Autonomous Region, Institute of Applied Chemistry, Xinjiang University, Urumqi, Xinjiang 830046, China

\*To whom correspondence should be addressed.

E-mail: [jdz@xju.edu.cn](mailto:jdz@xju.edu.cn) (Dianzeng Jia)

<sup>‡</sup>These authors contributed equally to this work.

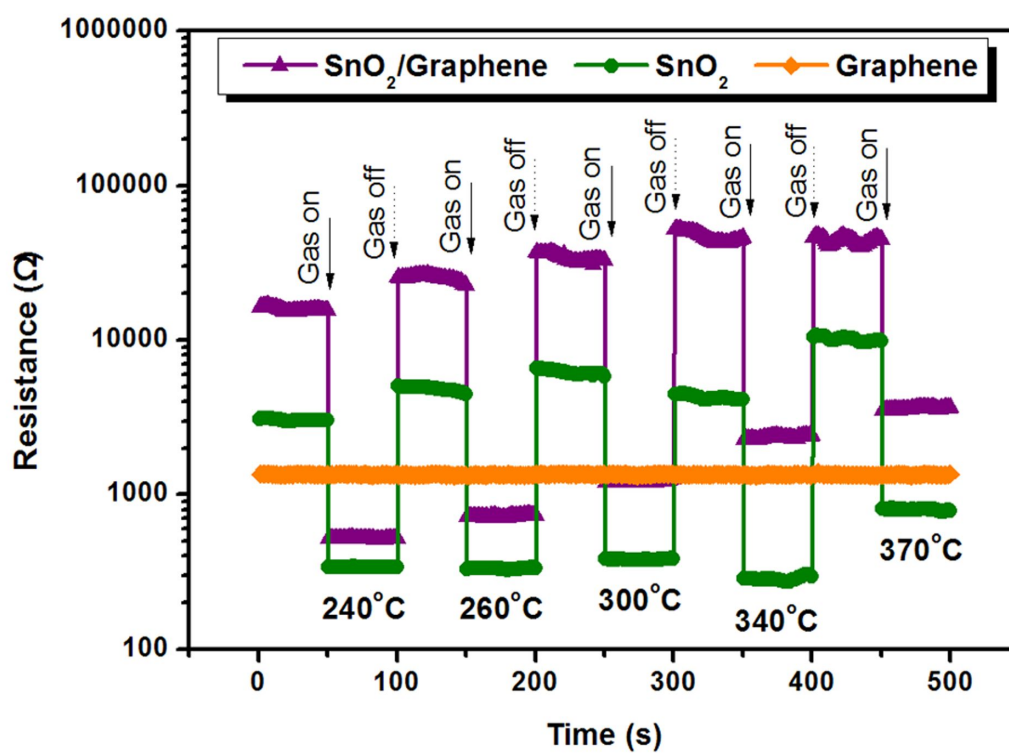

**Fig. S1** Resistance transients of the sensor to 100 ppm HCHO at different operating temperatures.

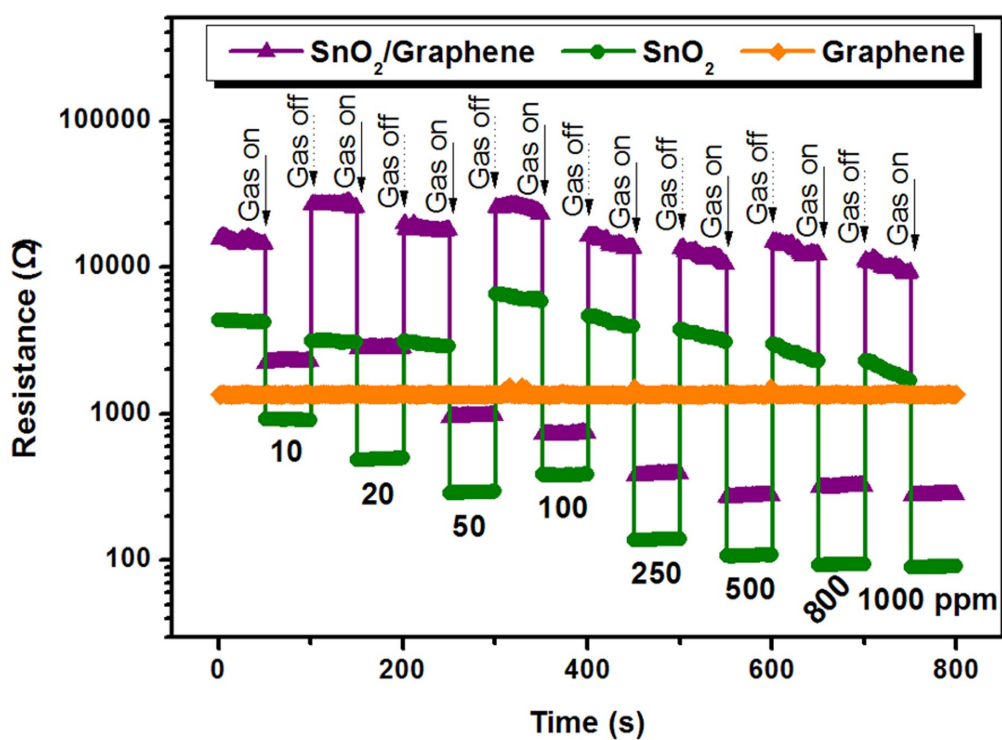

Fig. S2 Resistance transients of the sensors to different concentrations of HCHO.

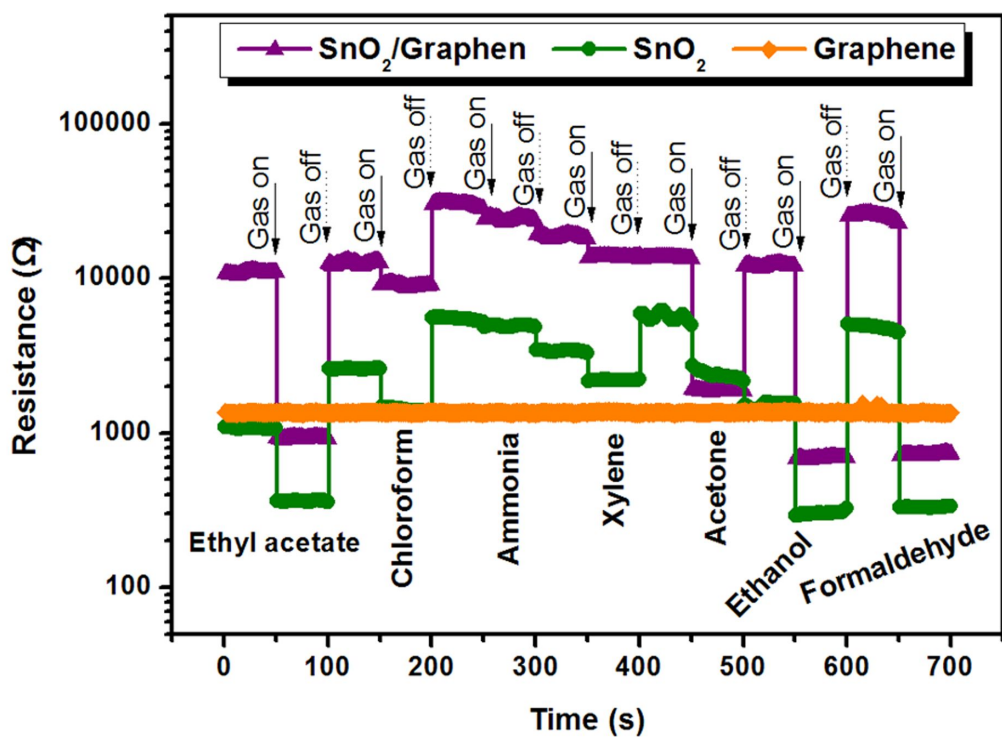

Fig. S3 Resistance transients of the sensors to 100 ppm various vapours at 260°C.
